# Supplementary material for: A fluorine-modulated bulk-phase heterojunction and tolerance factor for enhanced performance and structure stability of cesium lead halide perovskite solar cells
Source: Royal Society of Chemistry journal article supplement (doi:10.1039/c8ta02899k), 2018-01-01
Supplement: c8ta02899k1.pdf [file c8ta02899k1.pdf]

*Supporting Information*

**Fluorine Modulated Bulk-Phase Heterojunction and Tolerance Factor for Enhanced Performance and Structure Stability of Cesium Lead Halide Perovskite Solar Cells**

Lin Fu, Yanan Zhang, Bo Li, Tong Yu, Shujie Zhou, Luyaun Zhang, Longwei Yin\*

Key Laboratory for Liquid-Solid Structural Evolution and Processing of Materials, Ministry of Education, School of Materials Science and Engineering, Shandong University, Jinan 250061, P. R. China

\*E-mail: yinlw@sdu.edu.cn

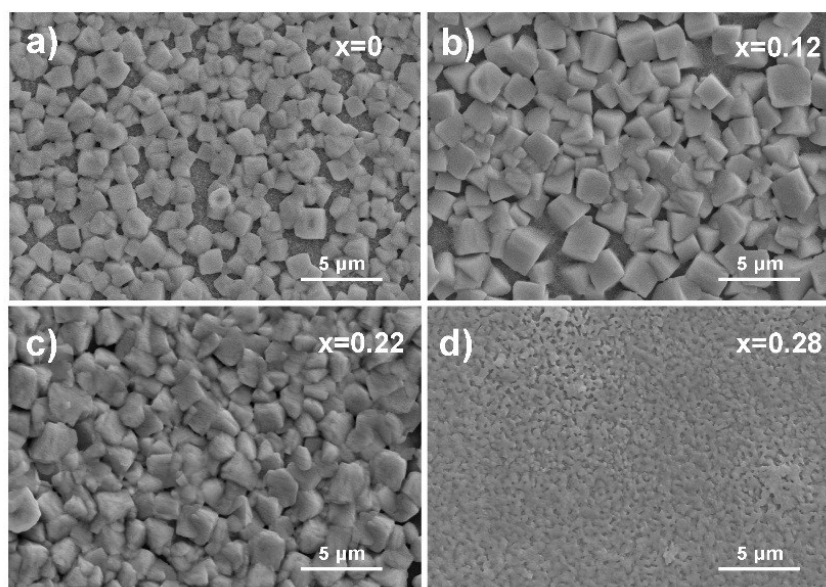

Fig. S1 Top view SEM images of CsPbBrI<sub>2-x</sub>F<sub>x</sub> films.

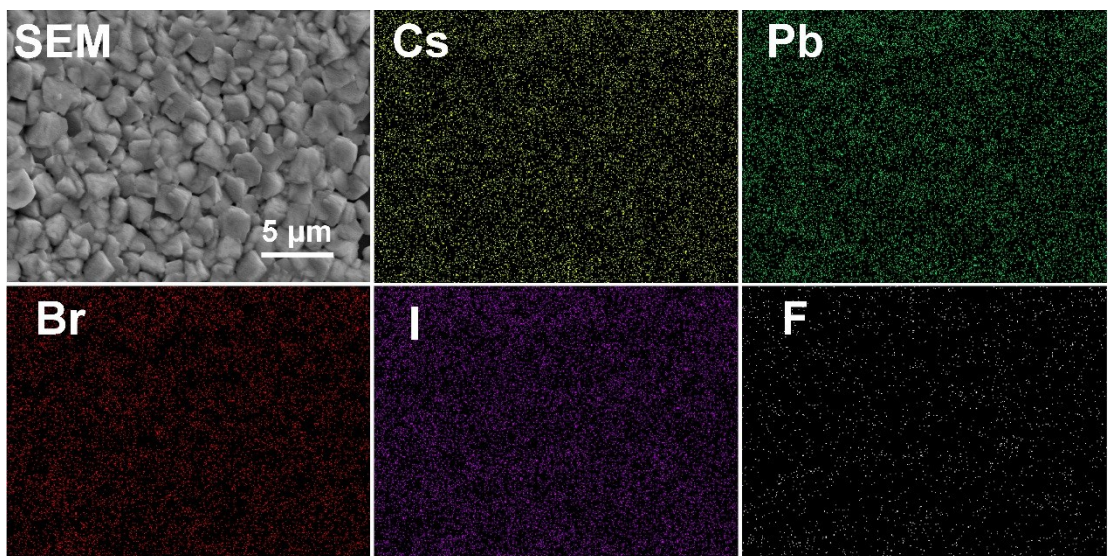

Fig. S2 EDS mapping images for each element of the CsPbBrI<sub>1.78</sub>F<sub>0.22</sub> film in top view.

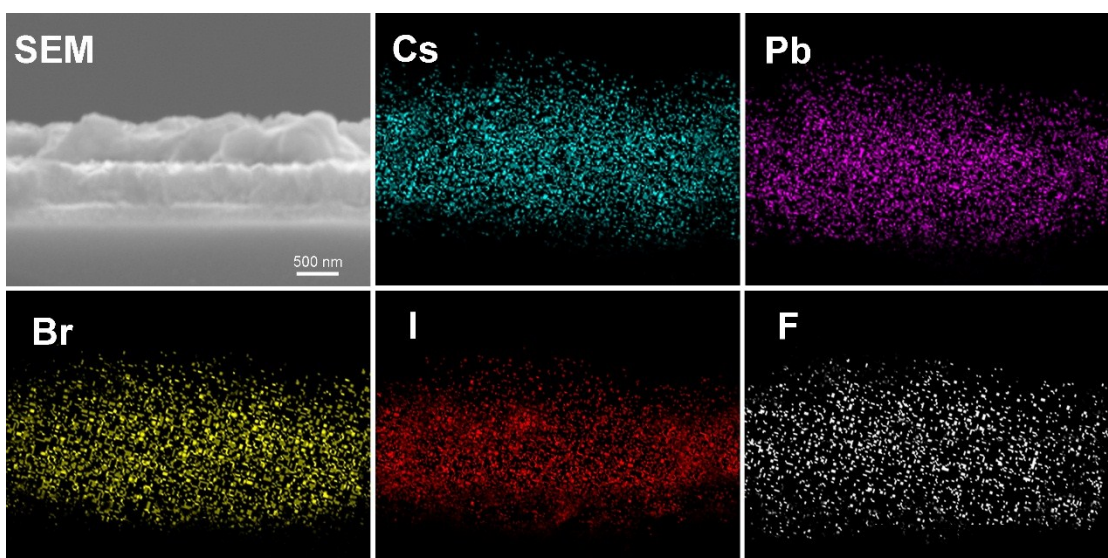

Fig. S3 Cross-section EDS mapping images for each element of the CsPbBrI<sub>1.78</sub>F<sub>0.22</sub> film on FTO.

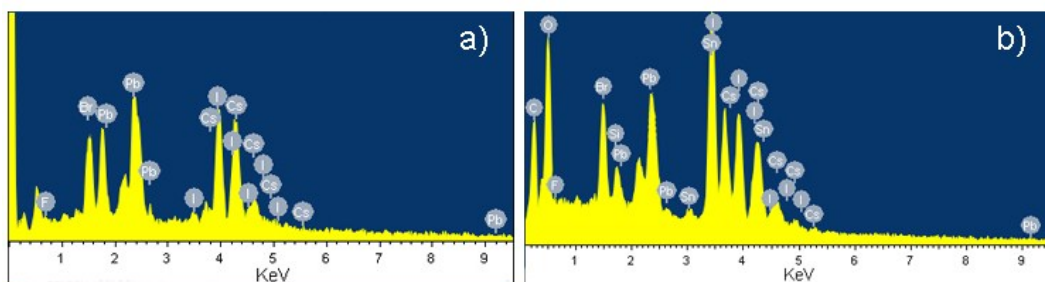

Fig. S4 EDS spectra of CsPbBrI<sub>1.78</sub>F<sub>0.22</sub> film on FTO in a) top view and b) sectional view.

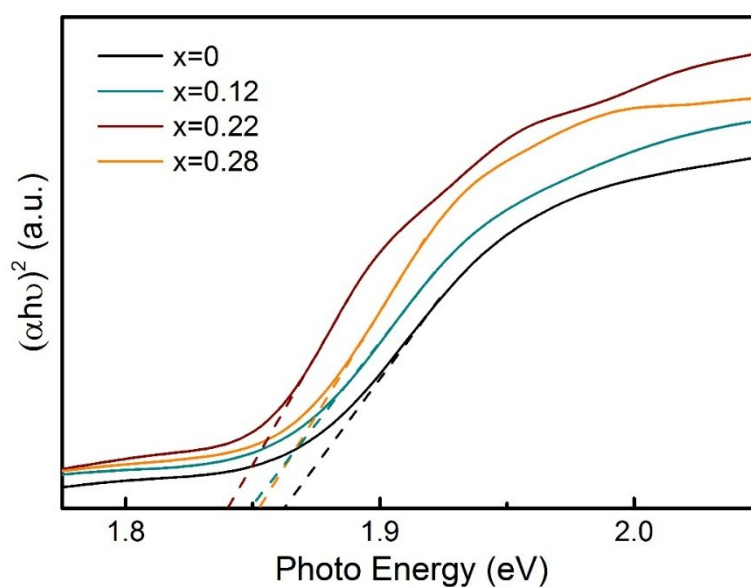

Fig. S5 Tauc plots of CsPbBrI<sub>2-x</sub>F<sub>x</sub> films calculated from the absorption spectra for the band gaps.

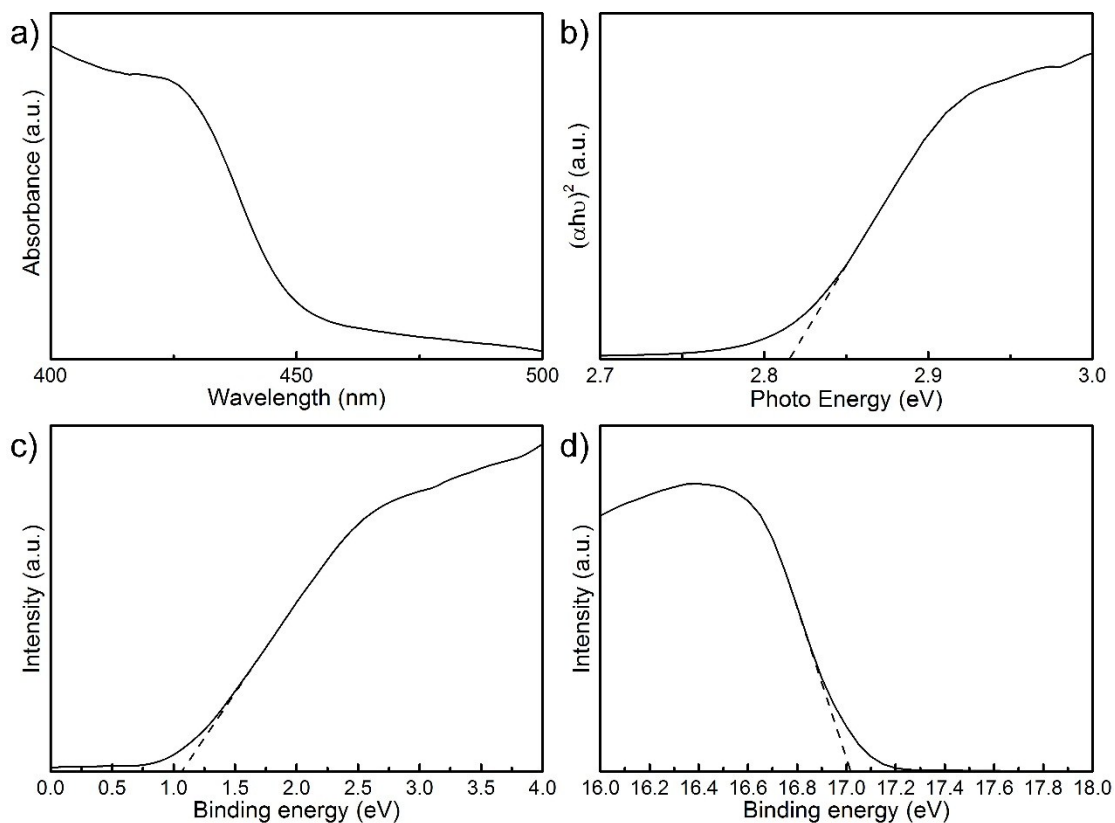

Fig. S6 a) Absorption spectra of the CsPbBrI<sub>2</sub> film in  $\delta$ -phase. b) Tauc plots calculated from the absorption spectra for the band gap of the  $\delta$ -CsPbBrI<sub>2</sub>. c-d) UPS spectra of the CsPbBrI<sub>2</sub> film in  $\delta$ -phase.

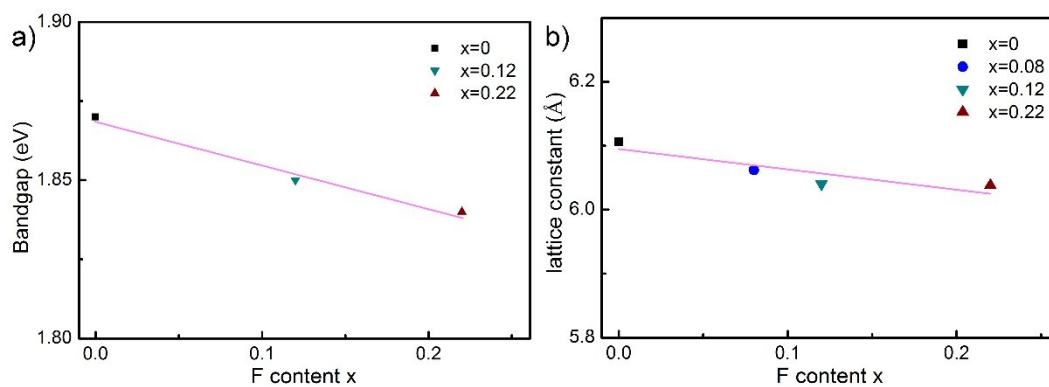

Fig. S7 a) Optical bandgap and b) lattice constant of CsPbBrI<sub>2-x</sub>F<sub>x</sub>, showing a linear relationship of the F content in the mixed halide perovskites.

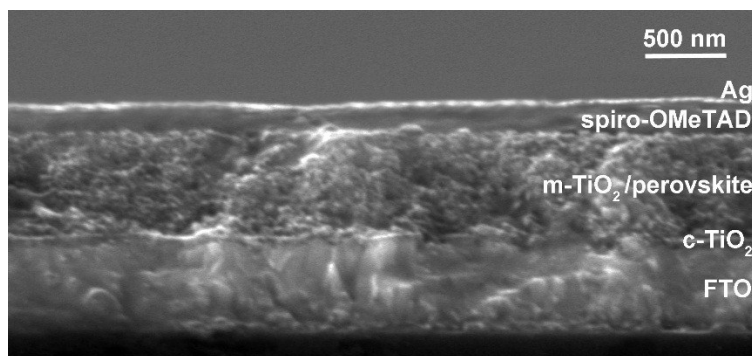

Fig. S8 Cross-section SEM image of CsPbBr<sub>1.78</sub>F<sub>0.22</sub> PSC.

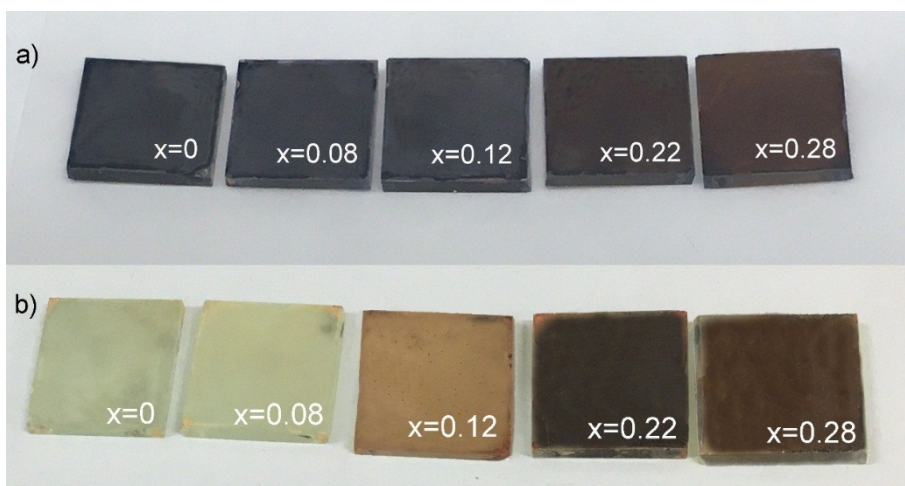

Fig. S9 Photos of CsPbBrI<sub>2-x</sub>F<sub>x</sub> films prepared on glass/FTO/c-TiO<sub>2</sub>/m-TiO<sub>2</sub> substrates a) immediately after annealing and b) under the humidity of RH 70% at room temperature after one day.

Table S1. Lattice constants of (110) peaks identified from XRD according to the Bragg equation.

| x    | 2 $\theta$ (degree) | a (Å) |
|------|---------------------|-------|
| 0    | 20.57               | 6.106 |
| 0.08 | 20.72               | 6.062 |
| 0.12 | 20.80               | 6.039 |
| 0.22 | 20.80               | 6.039 |
| 0.28 | 20.67               | 6.077 |

Table S2. Photoluminescence lifetimes fitted by the biexponential formula for CsPbBrI<sub>2-x</sub>F<sub>x</sub> films.

| x    | $\tau_1$ (ns) | a <sub>1</sub> (%) | $\tau_2$ (ns) | a <sub>2</sub> (%) | Ave (ns) |
|------|---------------|--------------------|---------------|--------------------|----------|
| 0    | 0.75          | 83.43              | 3.24          | 16.57              | 1.16     |
| 0.22 | 1.69          | 74.49              | 19.01         | 25.51              | 6.11     |

Table S3. Photovoltaic parameters of short-circuit photocurrent density ( $J_{SC}$ ), open-circuit voltage ( $V_{OC}$ ), fill factor (FF) and power conversion efficiency (PCE) of CsPbBrI<sub>2</sub> PSCs.

| Sample | $V_{OC}$ (V) | $J_{SC}$ (mA cm <sup>-2</sup> ) | FF (%)     | PCE (%)   |
|--------|--------------|---------------------------------|------------|-----------|
| 1      | 0.97         | 13.16                           | 67         | 8.55      |
| 2      | 0.89         | 12.89                           | 68         | 7.80      |
| 3      | 0.96         | 12.56                           | 66         | 7.96      |
| 4      | 0.98         | 12.63                           | 65         | 8.04      |
| 5      | 0.99         | 12.15                           | 65         | 7.82      |
| 6      | 0.96         | 11.96                           | 64         | 7.35      |
| 7      | 0.99         | 12.69                           | 64         | 8.04      |
| 8      | 0.95         | 12.80                           | 69         | 8.39      |
| 9      | 1.02         | 13.00                           | 64         | 8.48      |
| 10     | 0.99         | 13.51                           | 63         | 8.43      |
| 11     | 0.93         | 13.21                           | 63         | 7.74      |
| 12     | 0.95         | 13.10                           | 62         | 7.71      |
| 13     | 0.98         | 12.66                           | 62         | 7.69      |
| 14     | 0.92         | 12.95                           | 61         | 7.27      |
| 15     | 0.90         | 12.86                           | 60         | 6.74      |
| 16     | 0.96         | 12.03                           | 58         | 6.70      |
| Ave    | 0.96±0.04    | 12.76±0.43                      | 63.81±2.90 | 7.79±0.56 |



Table S4. Photovoltaic parameters of short-circuit photocurrent density ( $J_{SC}$ ), open-circuit voltage ( $V_{OC}$ ), fill factor (FF) and power conversion efficiency (PCE) of CsPbBr<sub>1.88</sub>F<sub>0.12</sub> PSCs.

| Sample | $V_{OC}$ (V) | $J_{SC}$ (mA cm <sup>-2</sup> ) | FF (%)     | PCE (%)   |
|--------|--------------|---------------------------------|------------|-----------|
| 1      | 1.00         | 13.71                           | 67         | 9.18      |
| 2      | 0.93         | 13.35                           | 72         | 8.94      |
| 3      | 0.96         | 11.65                           | 74         | 8.28      |
| 4      | 0.94         | 11.87                           | 71         | 7.92      |
| 5      | 0.98         | 13.24                           | 68         | 8.82      |
| 6      | 0.96         | 13.43                           | 65         | 8.38      |
| 7      | 0.99         | 12.54                           | 65         | 8.07      |
| 8      | 0.97         | 13.35                           | 64         | 8.29      |
| 9      | 0.97         | 13.84                           | 63         | 8.46      |
| 10     | 0.95         | 13.94                           | 60         | 7.95      |
| 11     | 0.94         | 14.28                           | 59         | 7.92      |
| 12     | 0.98         | 14.54                           | 61         | 8.69      |
| 13     | 0.94         | 13.87                           | 62         | 8.08      |
| 14     | 0.92         | 13.95                           | 58         | 7.44      |
| 15     | 0.91         | 14.21                           | 63         | 8.15      |
| 16     | 0.94         | 14.36                           | 62         | 8.37      |
| Ave    | 0.96±0.03    | 13.51±0.85                      | 64.63±4.69 | 8.31±0.44 |

Table S5. Photovoltaic parameters of short-circuit photocurrent density ( $J_{SC}$ ), open-circuit voltage ( $V_{OC}$ ), fill factor (FF) and power conversion efficiency (PCE) of CsPbBr<sub>1.78</sub>F<sub>0.22</sub> PSCs.

| Sample | $V_{OC}$ (V) | $J_{SC}$ (mA cm <sup>-2</sup> ) | FF (%)     | PCE (%)   |
|--------|--------------|---------------------------------|------------|-----------|
| 1      | 1.01         | 14.94                           | 68         | 10.26     |
| 2      | 0.96         | 14.69                           | 67         | 9.45      |
| 3      | 0.94         | 14.91                           | 67         | 9.39      |
| 4      | 0.96         | 14.45                           | 68         | 9.53      |
| 5      | 0.95         | 14.77                           | 66         | 9.26      |
| 6      | 1.00         | 13.22                           | 66         | 8.73      |
| 7      | 1.01         | 15.18                           | 65         | 9.97      |
| 8      | 0.98         | 14.59                           | 65         | 9.29      |
| 9      | 0.96         | 13.75                           | 65         | 8.58      |
| 10     | 0.97         | 15.63                           | 65         | 9.85      |
| 11     | 0.95         | 15.08                           | 64         | 9.17      |
| 12     | 0.99         | 15.29                           | 63         | 9.54      |
| 13     | 1.00         | 15.54                           | 63         | 9.79      |
| 14     | 0.90         | 13.54                           | 67         | 8.16      |
| 15     | 0.98         | 14.92                           | 62         | 9.06      |
| 16     | 1.02         | 13.86                           | 61         | 8.62      |
| Ave    | 0.97±0.03    | 14.65±0.71                      | 65.13±2.09 | 9.29±0.56 |

Table S6. Photovoltaic parameters of short-circuit photocurrent density ( $J_{SC}$ ), open-circuit voltage ( $V_{OC}$ ), fill factor (FF) and power conversion efficiency (PCE) of CsPbBr<sub>1.72</sub>F<sub>0.28</sub> PSCs.

| Sample | $V_{OC}$ (V) | $J_{SC}$ (mA cm <sup>-2</sup> ) | FF (%)     | PCE (%)   |
|--------|--------------|---------------------------------|------------|-----------|
| 1      | 1.02         | 13.69                           | 68         | 9.50      |
| 2      | 0.98         | 13.13                           | 67         | 8.62      |
| 3      | 0.97         | 13.16                           | 67         | 8.55      |
| 4      | 1.01         | 12.36                           | 66         | 8.24      |
| 5      | 0.98         | 12.90                           | 66         | 8.34      |
| 6      | 1.01         | 13.72                           | 67         | 9.28      |
| 7      | 0.99         | 12.57                           | 68         | 8.46      |
| 8      | 0.96         | 13.36                           | 62         | 7.95      |
| 9      | 0.98         | 12.95                           | 69         | 8.76      |
| 10     | 0.99         | 12.79                           | 66         | 8.36      |
| 11     | 0.98         | 13.78                           | 69         | 9.32      |
| 12     | 0.99         | 13.77                           | 68         | 9.27      |
| 13     | 0.96         | 13.52                           | 64         | 8.31      |
| 14     | 1.02         | 13.67                           | 63         | 8.78      |
| 15     | 1.00         | 13.73                           | 65         | 8.92      |
| 16     | 0.99         | 12.86                           | 66         | 8.40      |
| Ave    | 0.99±0.02    | 13.25±0.47                      | 66.31±2.02 | 8.69±0.45 |

Table S7. Impedance characteristics of CsPbBr<sub>2-x</sub>F<sub>x</sub> PSCs extracted from the Nyquist plots.

| x    | $R_{SH}$ ( $\Omega$ ) | $R_{CT}$ ( $\Omega$ ) |
|------|-----------------------|-----------------------|
| 0    | 37.04                 | 58.50                 |
| 0.12 | 35.98                 | 57.01                 |
| 0.22 | 36.88                 | 42.12                 |
| 0.28 | 37.43                 | 92.5                  |
